# Supplementary material for: Quantifying the influence of the tobacco industry on EU governance: automated content analysis of the EU Tobacco Products Directive
Source: PubMed Central journal article supplement (PMC4215371; doi:10.1136/tobaccocontrol-2014-051822), 2014-08-14
Supplement: tobaccocontrol-2014-051822-s1.pdf [file tobaccocontrol-2014-051822-s1.pdf]

Web Appendix 1. Reproduction of Table 3 with alternative classification

| Texts                                       | Number of Unique Words | Total Words Scored | Raw Word score (Standard error) | MV Transformed Word Score | 95% Confidence Interval (MV) |             |
|---------------------------------------------|------------------------|--------------------|---------------------------------|---------------------------|------------------------------|-------------|
|                                             |                        |                    |                                 |                           | Lower Bound                  | Upper Bound |
| Retailer Working Group                      | 942                    | 3965               | 0.49 (0.0007)                   | 0.39                      | 0.38                         | 0.41        |
| European Trade Union Confederation          | 674                    | 2210               | 0.49 (0.0011)                   | 0.39                      | 0.37                         | 0.42        |
| European Magazine Media Association         | 309                    | 840                | 0.49 (0.0016)                   | 0.41                      | 0.37                         | 0.45        |
| Association of Communication Companies      | 363                    | 1120               | 0.50 (0.0013)                   | 0.45                      | 0.42                         | 0.48        |
| European Communities Trademark Association  | 356                    | 1019               | 0.50 (0.0013)                   | 0.48                      | 0.45                         | 0.51        |
| Association of German Magazine Publishers   | 384                    | 1218               | 0.50 (0.0012)                   | 0.49                      | 0.46                         | 0.52        |
| Joint Statements of Trade Mark Associations | 366                    | 976                | 0.50 (0.0015)                   | 0.50                      | 0.46                         | 0.54        |
| Final                                       | 1235                   | 12115              | 0.50 (0.0004)                   | 0.52                      | 0.51                         | 0.53        |
| Commission                                  | 1314                   | 11181              | 0.50 (0.0004)                   | 0.55                      | 0.54                         | 0.56        |
| Consultation                                | 689                    | 2592               | 0.51 (0.0008)                   | 0.62                      | 0.60                         | 0.64        |

Notes: Raw scores using Wordscores for Stata. Confidence intervals calculated by authors using M-V transformation. Results presented from lowest to highest word scores.
